# Supplementary material for: Pathway Analysis: State of the Art
Source: PubMed Central journal article supplement (PMC4681784; doi:10.3389/fphys.2015.00383), 2015-12-17
Supplement: Table1.pdf [file Table1.pdf]

| ORA           |                                         |                             |                                        |                 |
|---------------|-----------------------------------------|-----------------------------|----------------------------------------|-----------------|
| Method        | Implementation URL                      | Reference                   | Google Scholar cites until August 2015 | Year of release |
| FunSpec       | funspec.med.utoronto.ca                 | Robinson et al., 2002       | 342                                    | 2002            |
| Onto-Express  | vortex.cs.wayne.edu/ontoexpress         | Khatri et al., 2002         | 427                                    | 2002            |
| EASE          | david.abcc.ncifcrf.gov/ease/ease1.htm   | Hosack et al., 2003         | 1747                                   | 2003            |
| FuncAssociate | llama.mshri.on.ca/funcassociate         | Berriz et al., 2003         | 377                                    | 2003            |
| GARBAN        | garban.tecnun.es/ (NLA)                 | Martínez-Cruz et al., 2003  | 29                                     | 2003            |
| GeneMerge     | cbcb.umd.edu/software/genemerge (NLA)   | Castillo-Davis et al., 2003 | 258                                    | 2003            |
| GoMiner       | discover.nci.nih.gov/gominer            | Zeeber et al., 2003         | 1147                                   | 2003            |
| MAPPFinder    | genmapp.org/help_v2/MAPPFinder.htm      | Doniger et al., 2003        | 922                                    | 2003            |
| FatiGO        | babelomics.org                          | Al-Shahrour et al., 2004    | 1002                                   | 2004            |
| GO:TermFinder | search.cpan.org/dist/GO-TermFinder      | Boyle et al., 2004          | 978                                    | 2004            |
| GOstat        | gostat.wehi.edu.au                      | Beißbarth et al., 2004      | 1021                                   | 2004            |
| GOToolBox     | genome.crg.es/GOToolBox/                | Martin et al., 2004         | 329                                    | 2004            |
| Ontologizer   | compbio.charite.de/ontologizer          | Robinson et al., 2004       | 100                                    | 2004            |
| WebGestalt    | bioinfo.vanderbilt.edu/webgestalt       | Zhang et al., 2005          | 790                                    | 2005            |
| BiNGO         | psb.ugent.be/cbd/papers/BiNGO/Home.html | Maere et al., 2005          | 1548                                   | 2005            |
| GOFFA         | edkb.fda.gov/webstart/arraytrack        | Sun et al., 2006            | 52                                     | 2006            |
| GOStats       | bioconductor.org                        | Falcon & Gentleman, 2007    | 734                                    | 2007            |
| GOEAST        | omicslab.genetics.ac.cn/GOEAST          | Zheng et al., 2008          | 379                                    | 2008            |
| ClueGO        | apps.cytoscape.org/apps/cluego          | Bindea et al., 2009         | 459                                    | 2009            |
| agriGO        | bioinfo.cau.edu.cn/agriGO               | Du et al., 2010             | 594                                    | 2010            |
| GO-Bayes      | Upon author request                     | Zhang et al., 2010          | 20                                     | 2010            |
| GO-Elite      | genmapp.org/go_elite/                   | Zambon et al., 2012         | 58                                     | 2012            |
| FCS           |                                         |                             |                                        |                 |
| Method        | Implementation URL                      | Reference                   | Google Scholar cites until August 2015 | Year of release |
| Catmap        | bioinfo.thep.lu.se/catmap.html          | Breslin et al. 2004         | 68                                     | 2004            |
| GlobalTest    | bioconductor.org                        | Goeman et al., 2004         | 695                                    | 2004            |
| GOAL          | microarrays.unife.it (NLA)              | Volinia et al. 2004         | 50                                     | 2004            |
| GO-Mapper     | gatcplatform.nl/gomapper/               | Smid et al. 2004            | 57                                     | 2004            |
| IGA           | biomedcentral.com/1471-2105/5/34        | Breitling et al., 2004      | 143                                    | 2004            |
| Erminej       | bioinformatics.ubc.ca/erminej           | Lee et al., 2005            | 234                                    | 2005            |
| GSEA          | broadinstitute.org/gsea                 | Subramanian et al., 2005    | 7840                                   | 2005            |

| FunCluster       | corneliu.henegar.info/FunCluster.htm   | Henegar et al., 2006      | 20                                            | 2005                   |
|------------------|----------------------------------------|---------------------------|-----------------------------------------------|------------------------|
| PLAGE            | dulci.biostat.duke.edu/pathways/ (NLA) | Tomfohr et al., 2005      | 147                                           | 2005                   |
| SAFE             | bioconductor.org                       | Barry et al., 2005        | 253                                           | 2005                   |
| sigPathway       | bioconductor.org                       | Tian et al., 2005         | 497                                           | 2005                   |
| T-profiler       | t-profiler.org                         | Boorsma et al., 2005      | 191                                           | 2005                   |
| AE               | No implementation available            | Saxena et al. 2006        | 40                                            | 2006                   |
| ASSESS           | people.genome.duke.edu/assess/         | Edelman et al. 2006       | 64                                            | 2006                   |
| JProGO           | jprogo.de/                             | Scheer et al. 2006        | 38                                            | 2006                   |
| Category         | bioconductor.org/packages/Category/    | Gentleman et al., 2007    | 165                                           | 2007                   |
| Fatiscan         | babelomics.org                         | Al-Shahrour et al. 2007   | 112                                           | 2007                   |
| GAzer            | integromics.kobic.re.kr/Gazer (NLA)    | Kim et al., 2007          | 33                                            | 2007                   |
| GeneTrail        | genetrail.bioinf.uni-sb.de             | Backes et al., 2007       | 239                                           | 2007                   |
| GlobalANCOVA     | bioconductor.org                       | Hummel et al., 2007       | 108                                           | 2007                   |
| GSA              | cran.r-project.org/web/packages/GSA    | Efron et al. 2007         | 539                                           | 2007                   |
| PCOT2            | bioconductor.org/packages/pcot2/       | Song et al., 2007         | 73                                            | 2007                   |
| Allez            | stat.wisc.edu/~newton/                 | Newton et al. 2007        | 167                                           | 2007                   |
| SAM-GS           | ualberta.ca/~yyasui/homepage.html      | Dinu et al., 2007         | 207                                           | 2007                   |
| FUNC             | func.eva.mpg.de/                       | Prüfer et al., 2007       | 91                                            | 2007                   |
| Eu Gene Analyzer | duccioknights.org/?page_id=169         | Cavaliere et al. 2008     | 39                                            | 2008                   |
| GAGE             | bioconductor.org                       | Luo et al., 2009          | 130                                           | 2009                   |
| MGSA             | bioconductor.org                       | Bauer et al., 2010        | 98                                            | 2010                   |
| MSEA             | msea.ca/MSEA/faces/Home.jsp            | Xia et al., 2010          | 96                                            | 2010                   |
| GOSeq            | bioconductor.org/packages/goseq/       | Young et al., 2010        | 335                                           | 2010                   |
| MD-GSA           | bioconductor.org/packages/mdgsa/       | Montaner & Dopazo, 2010   | 20                                            | 2010                   |
| ADGO 2.0         | bttool.org/ADGO2                       | Nam et al. 2011           | 6                                             | 2011                   |
| Pathifier        | bioconductor.org                       | Drier et al., 2013        | 39                                            | 2013                   |
| GSVA             | bioconductor.org/packages/GSVA/        | Hänzelmann et al., 2013   | 40                                            | 2013                   |
| SeqGSEA          | bioconductor.org/packages/SeqGSEA/     | Wang and Cairns, 2014     | 7                                             | 2014                   |
| GSAASeqSp        | gsaa.unc.edu/                          | Xiong et al., 2014        | 5                                             | 2014                   |
| PathwaySeq       | Code provided in publication page      | Zhou, 2015                | 0                                             | 2015                   |
| <b>PTB</b>       |                                        |                           |                                               |                        |
| <b>Method</b>    | <b>Implementation URL</b>              | <b>Reference</b>          | <b>Google Scholar cites until August 2015</b> | <b>Year of release</b> |
| ScorePAGE        | No implementation available            | Rahnenführer et al., 2004 | 93                                            | 2004                   |
| IPA *            | ingenuity.com                          | Calvano et al., 2005      | 1080                                          | 2005                   |
| Pathway-Express  | vortex.cs.wayne.edu/projects.htm       | Khatri et al., 2005       | 111                                           | 2005                   |

|                 |                                                              |                               |     |      |
|-----------------|--------------------------------------------------------------|-------------------------------|-----|------|
| MetaCore *      | genego.com                                                   | Nikolsky et al., 2005         | 112 | 2005 |
| WPS             | abcc.ncifcrf.gov/wps (NLA)                                   | Yi et al., 2006               | 133 | 2006 |
| MATISSE         | acgt.cs.tau.ac.il/matisse                                    | Ulitsky and Shamir, 2007      | 244 | 2007 |
| TAPPA           | watson.mcgee.mcw.edu:8080/~sgao (NLA)                        | Gao and Wang, 2007            | 19  | 2007 |
| Ontologizer 2.0 | http://compbio.charite.de/contao/index.php/ontologizer2.html | Bauer et al., 2008            | 277 | 2008 |
| NetGSA          | cran.r-project.org/package=netgsa                            | Shojaie and Michailidis, 2009 | 33  | 2009 |
| PIPA            | No implementation available                                  | Bankhead et al., 2009         | 13  | 2009 |
| SPIA            | bioconductor.org                                             | Tarca et al., 2009            | 241 | 2009 |
| Snow            | babelomics.org                                               | Minguez et al., 2009          | 34  | 2009 |
| DEGraph         | bioconductor.org/packages/DEGraph/                           | Jacob et al., 2010            | 18  | 2010 |
| MetPA           | metpa.metabolomics.ca                                        | Xia and Wishart, 2010         | 86  | 2010 |
| PARADIGM        | sbenz.github.io/Paradigm                                     | Vaske et al., 2010            | 235 | 2010 |
| PWEA            | zlab.bu.edu/PWEA                                             | Hung et al., 2010             | 34  | 2010 |
| TopoGSA         | topogsa.org                                                  | Glaab et al., 2010            | 26  | 2010 |
| TopologyGSA     | cran.r-project.org/package=topologyGSA                       | Massa et al., 2010            | 32  | 2010 |
| BPA             | bioinfo.unl.edu/bpa                                          | Isci et al., 2011             | 18  | 2011 |
| DART            | bioconductor.org                                             | Jiao et al., 2011             | 11  | 2011 |
| GANPA           | cran.r-project.org/package=GANPA                             | Fang et al., 2011             | 12  | 2011 |
| Pathologist     | ftp://ftp1.nci.nih.gov/pub/pathologist                       | Greenblum et al., 2011        | 15  | 2011 |
| ACST            | dx.doi.org/10.1371/journal.pone.0041541                      | Mieczkowski et al., 2012      | 7   | 2012 |
| CePa            | cran.r-project.org/package=CePa                              | Gu et al., 2012               | 5   | 2012 |
| EnrichNet       | http://www.enrichnet.org                                     | Glaab et al., 2012            | 56  | 2012 |
| PathNet         | bioconductor.org                                             | Dutta et al., 2012            | 14  | 2012 |
| THINK-Back-DS   | wwwweb.eecs.umich.edu/db/think/                              | Farfán et al., 2012           | 6   | 2012 |
| Network Miner   | babelomics.org                                               | García-Alonso et al., 2012    | 16  | 2012 |

**Supplementary Table 1: List of found Pathway Analysis methods available.** The first column gives the names of the methods. The second one is the web site to each method. The third column contains the original reference to each method. The fourth column contains the number of citations to date of each one of those pathway analysis methods. Finally, the fifth column shows the year of release of those packages. \* = Commercial PA method.
